# Supplementary material for: The influence of plant water stress on vegetation–atmosphere exchanges: implications for ozone modelling
Source: Copernicus journal article supplement (doi:10.5194/bg-21-3251-2024), 2024-07-17
Supplement: Supplementary file 1 [file bg-21-3251-2024-supplement.pdf]

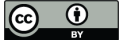

*Supplement of*

## **The influence of plant water stress on vegetation–atmosphere exchanges: implications for ozone modelling**

**Tamara Emmerichs et al.**

*Correspondence to:* Tamara Emmerichs ([t.emmerichs@fz-juelich.de](mailto:t.emmerichs@fz-juelich.de))

The copyright of individual parts of the supplement might differ from the article licence.

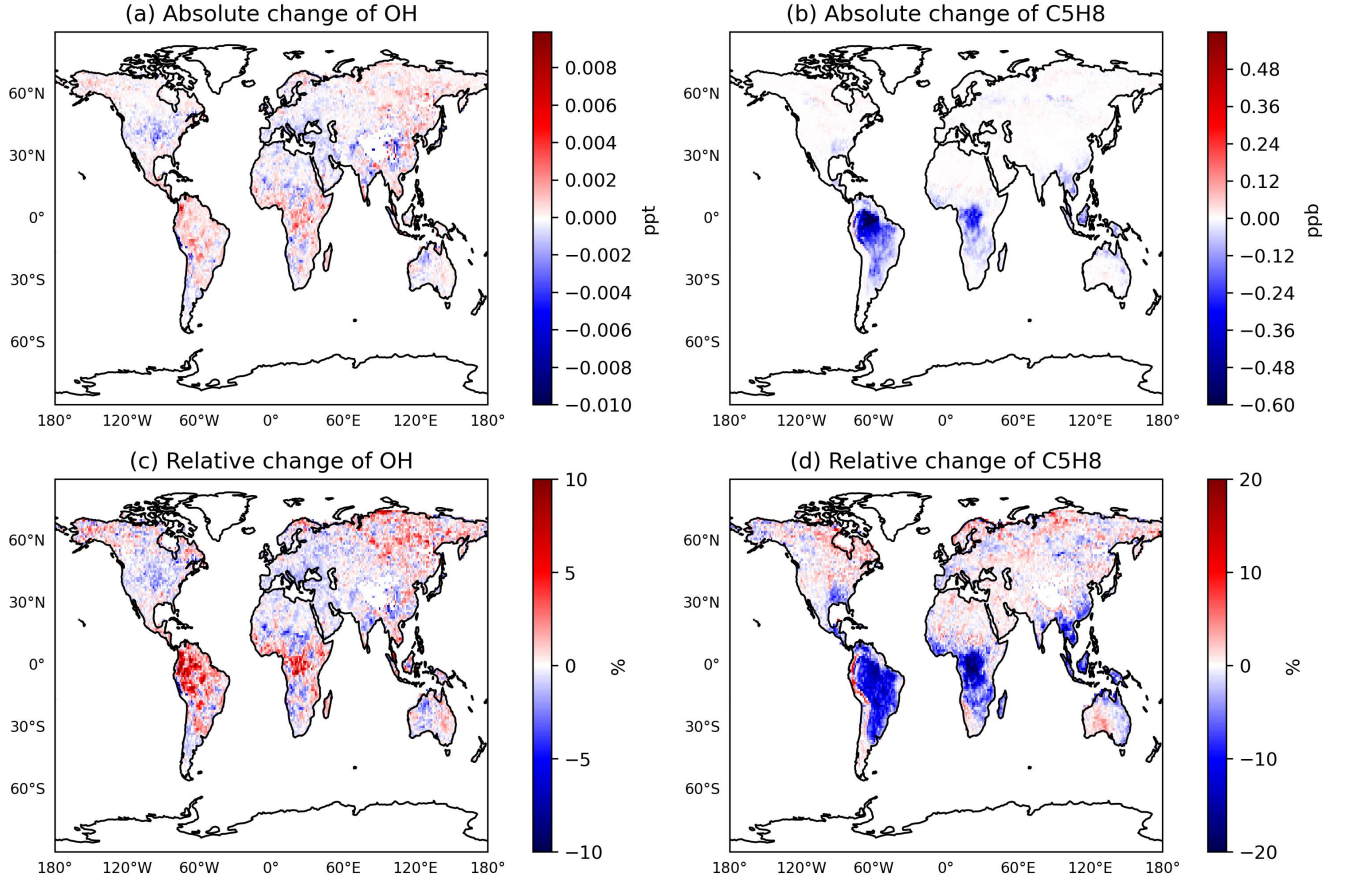

**Figure S1.** Annual mean relative change of OH (a) and isoprene (b) mixing ratio at the surface (for regions with isoprene > 50 ppt) (*LWPfrac-REF*).

## S1 Description of the photosynthesis model

According to the established IFS model,  $A_n$  is derived from the saturation level  $A_m$  (among others) and is used for the calculation of  $g_s$  afterwards. The calculation of the net assimilation rate ( $A_n$ ) distinguishes for a  $CO_2$  limiting and the radiation limiting regime which changes at level  $A_m$  (from radiation to  $CO_2$  limiting regime):

$$5 \quad A_m = A_{m,max} [1 - \exp(-g_m(C_i - \Gamma)/A_{m,max})] \quad (S1)$$

The maximum photosynthetic capacity  $A_{m,max}$  is calculated as follows:

$$A_{m,max}(T_s) = \frac{A_{m,max}(25)Q_{10A_{m,max}}^{(T_s-25)/10}}{(1 + e^{0.3(T_{1am,max}-T_s)})(1 + e^{0.3(T_{2am,max}-T_s)})} \quad (S2)$$

with  $T_{1am,max} = 8^\circ C$ ,  $T_{2am,max} = 38^\circ C$  and  $A_{m,max} = 2.2mg(CO_2)m^{-2}s^{-1}$ . The mesophyll conductance  $g_m$  is calculated:

$$10 \quad g_m(T_s) = \frac{g_m(25^\circ C)Q_{10g_m}^{(T_s-25)/10}}{(1 + e^{0.3(T_{1gm}-T_s)})(1 + e^{0.3(T_{2gm}-T_s)})} \quad (S3)$$

with  $T_{1g_m} = 5^\circ\text{C}$  and  $T_{2g_m} = 36^\circ\text{C}$ .  $T_s$  is the leaf surface temperature (here 2m temperature) and the  $Q_{10}$  constant is 2.  $g_m(25^\circ\text{C})$  depends on soil moisture and is further described in ECMWF (2021). An exponential transition function represents  $A_n$  in dependence on radiation and  $A_m$ . According to Calvet et al. (1998, 2004), plants respond in the a complex way through the mesophyll conductance ( $g_m$ ) to soil moisture stress:

$$15 \quad g_m(25^\circ\text{C}) = g_m^N \frac{f(W_s)}{W_{crit}} \quad (\text{S4})$$

$$g_m(25^\circ\text{C}) = g_m^N + g_m^0(25^\circ\text{C}) \frac{f(W_s) - W_{crit}}{1 - W_{crit}} \quad (\text{S5})$$

where  $g_m^0(25^\circ\text{C})$  is a species-dependent parameter (here:  $25 \text{ mm s}^{-1}$ ).  $g_m^N$  is the stressed value of  $g_m$  and described in ECMWF (2021).
